# Supplementary material for: Combating Antibiotic Resistance through the Synergistic Effects of Mesoporous Silica-Based Hierarchical Nanocomposites
Source: PubMed Central journal article supplement (PMC7153717; doi:10.3390/nano10030597), 2020-03-24
Supplement: nanomaterials-10-00597-s001.pdf [file nanomaterials-10-00597-s001.pdf]

## Supplementary Materials

# Combating Antibiotic Resistance Through the Synergistic Effects of Mesoporous Silica-Based Hierarchical Nanocomposites

Ranjith Kumar Kankala<sup>1,2,†</sup>, Wei-Zhi Lin<sup>1,†</sup> and Chia-Hung Lee<sup>1,\*</sup>

<sup>1</sup> Department of Life Science, National Dong Hwa University, Hualien 97401, Taiwan; ranjithkankala@hqu.edu.cn (R.K.K.), ex20122@gmail.com (W.-Z.L.)

<sup>2</sup> College of Chemical Engineering, Huaqiao University; Xiamen 361021, China

\* Correspondence: chlee016@gms.ndhu.edu.tw; Tel.: +886-3-890-3677

† These authors contributed equally to this work.

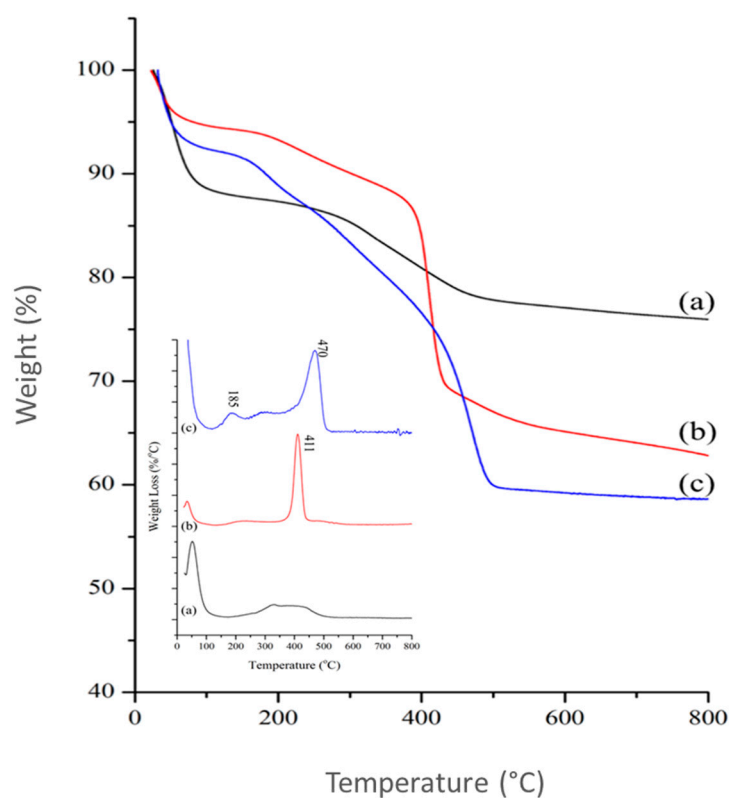

**Figure S1.** TGA curves of (a) Cu-MSN, (b) Cu-MSN-TET, and (c) PEI-SNP@Cu-MSN-TET. Inset showing the corresponding differential curves.

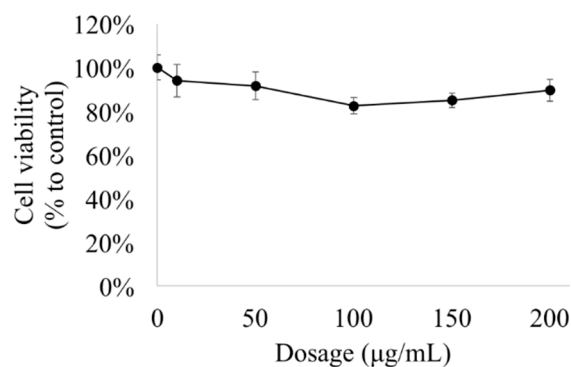

**Figure S2.** Biocompatibility study of PEI-SNP@Cu-MSN-TET nanoconjugates using MTT cytotoxicity assay in normal fibroblast cell line (3T3 cells).

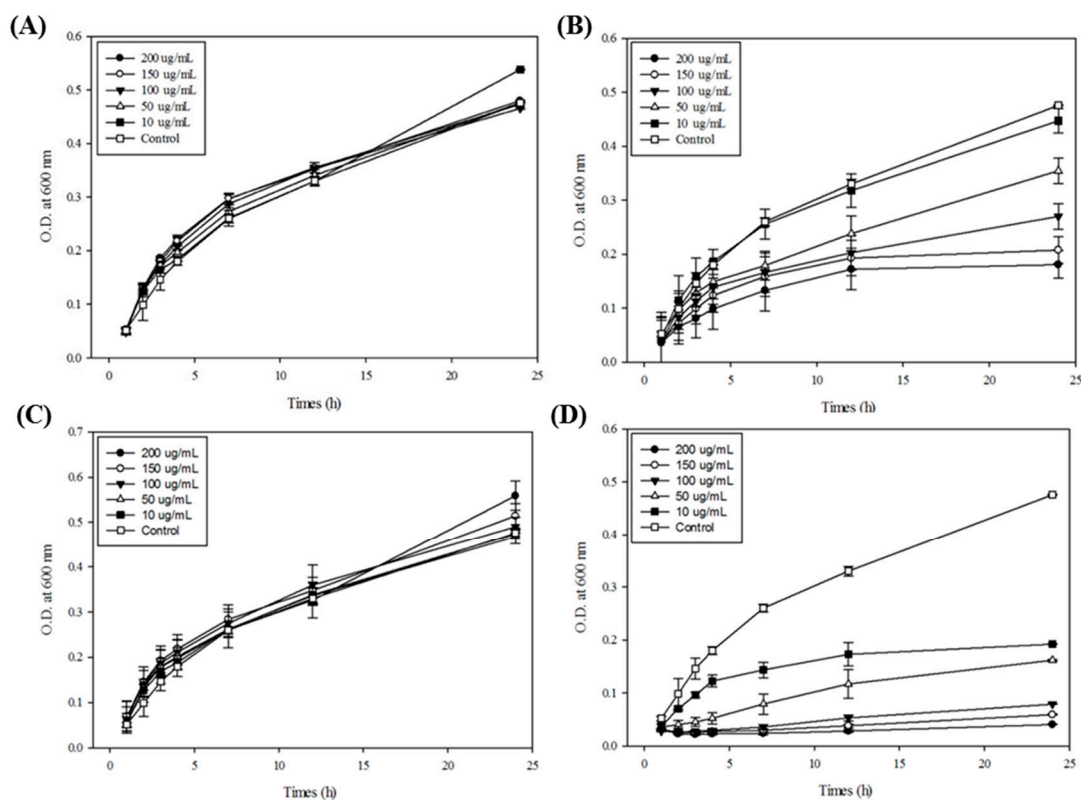

**Figure S3.** The bacterial growth studies of non-resistance *E. coli* strain. The growth curves from bacteria treated with (a) Cu-MSN, (b) Cu-MSN-TET, (c) PEI-SNP@Cu-MSN, (d) PEI-SNP@Cu-MSN-TET.

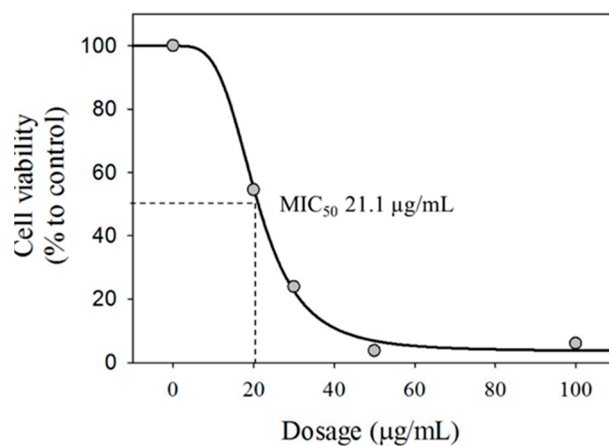

**Figure S4.** MIC calculation of PEI-SNP@Cu-MSN-TET sample in MDR *E. coli* strain. Bacteria was treated with a serial dosage of nanoparticles and incubated for 24 h.

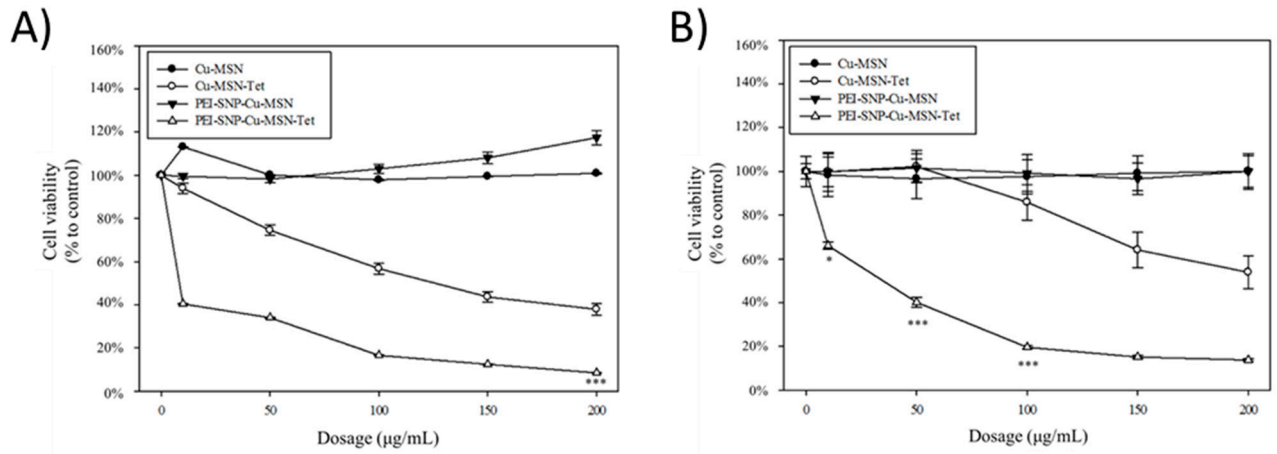

**Figure S5.** The antibacterial activity of nanoparticles on (A) non-resistance *E. coli* strain and (B) MDR *E. coli* strain. Bacteria was treated with a serial dosage of nanoparticles and incubated for 24 h. \*p value < 0.05, and \*\*\* p value < 0.001 with control.
